# Supplementary material for: Insights into genetic diversity and phenotypic variations in domestic geese through comprehensive population and pan-genome analysis
Source: PubMed Central journal article supplement (PMC10675864; doi:10.1186/s40104-023-00944-y), 2023-11-24

**A**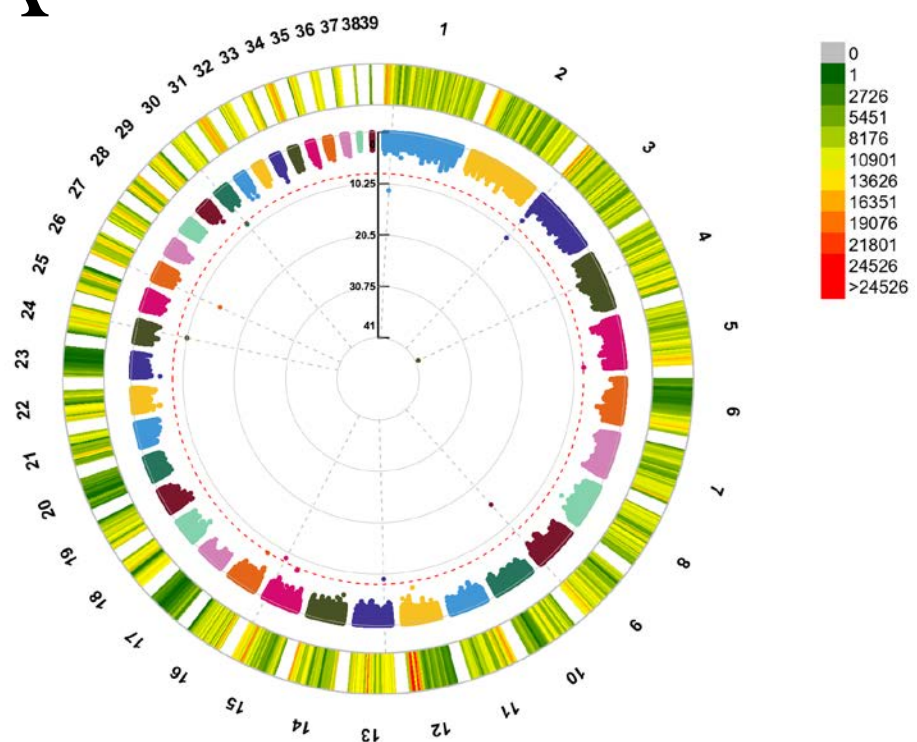**B**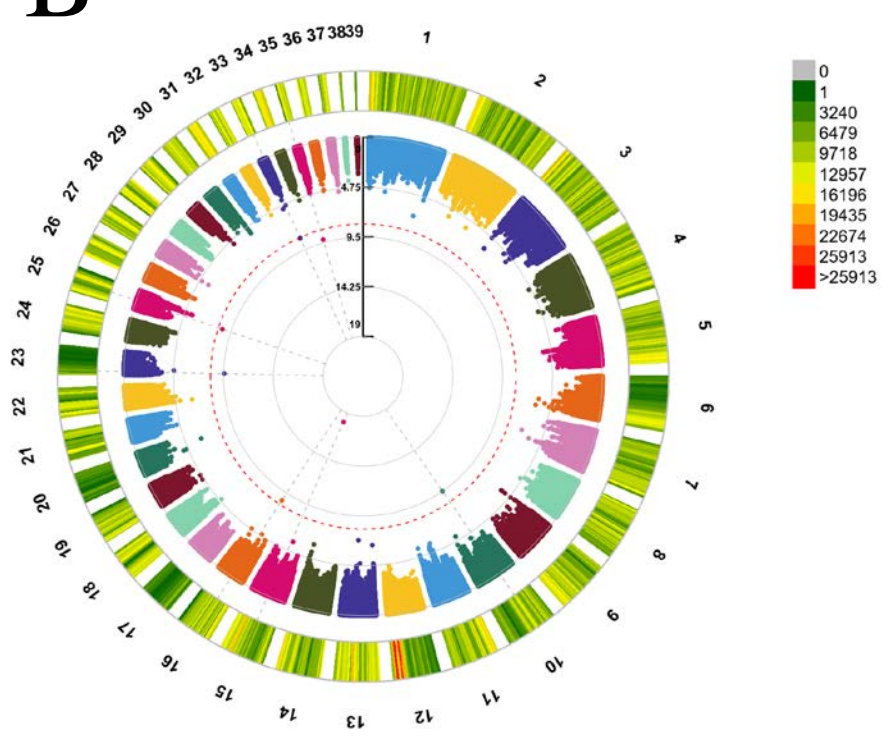**C**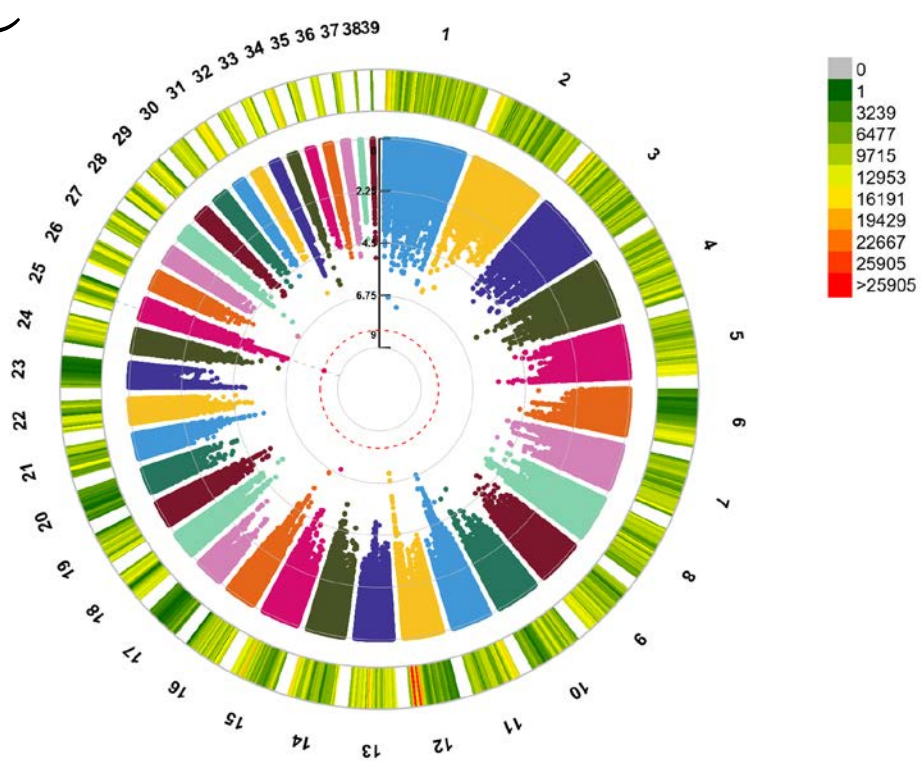**D**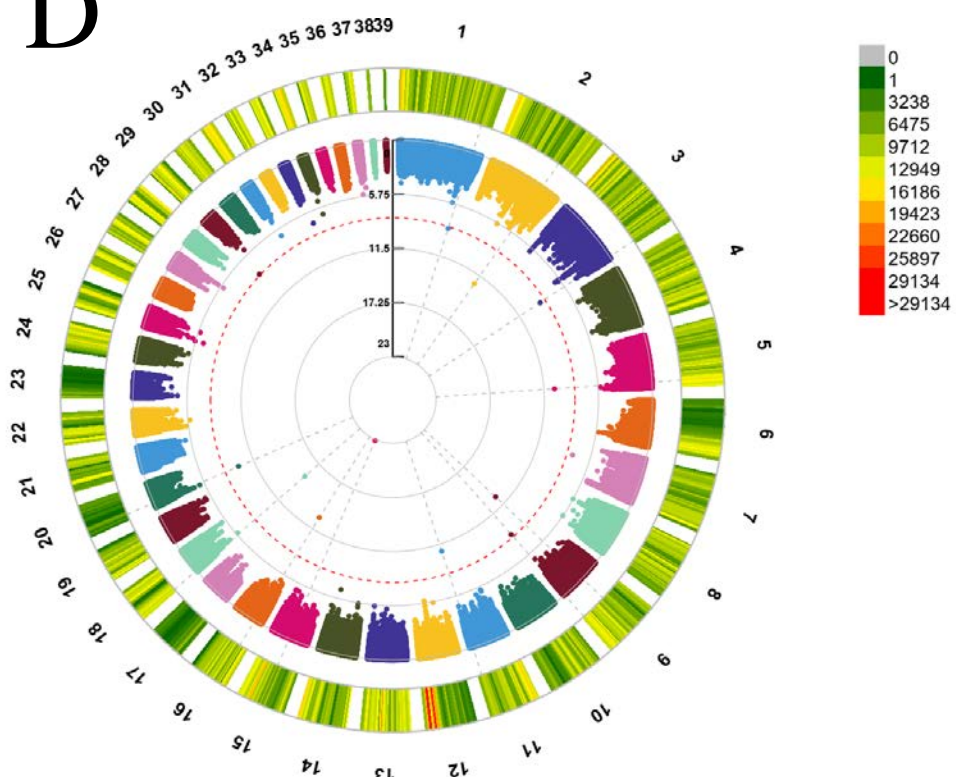**E**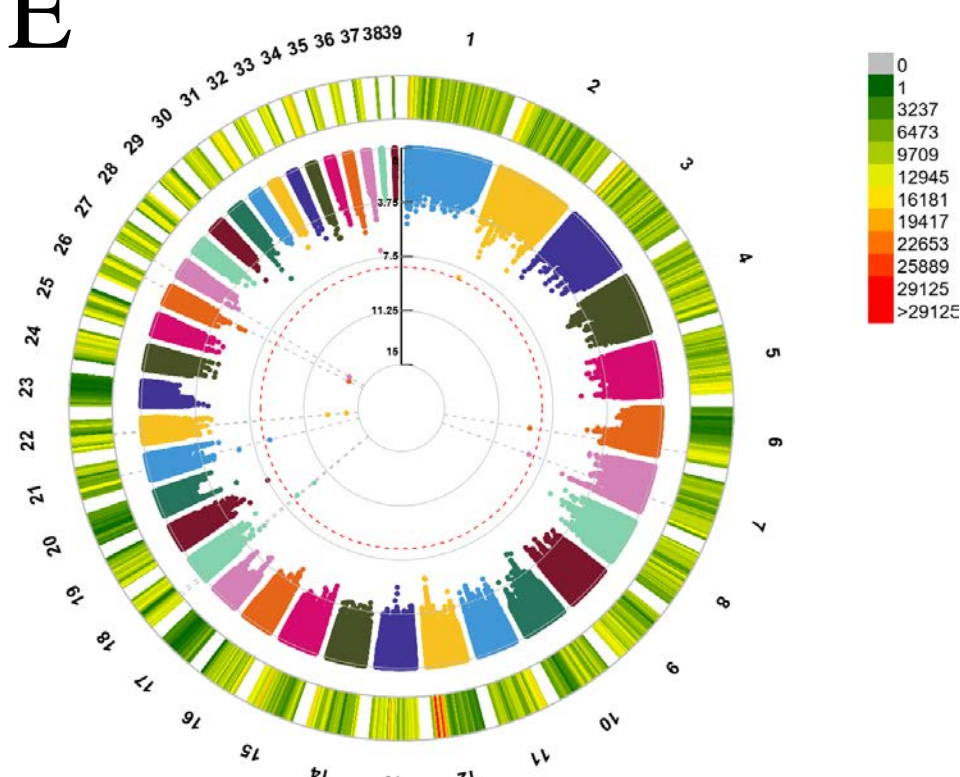**F**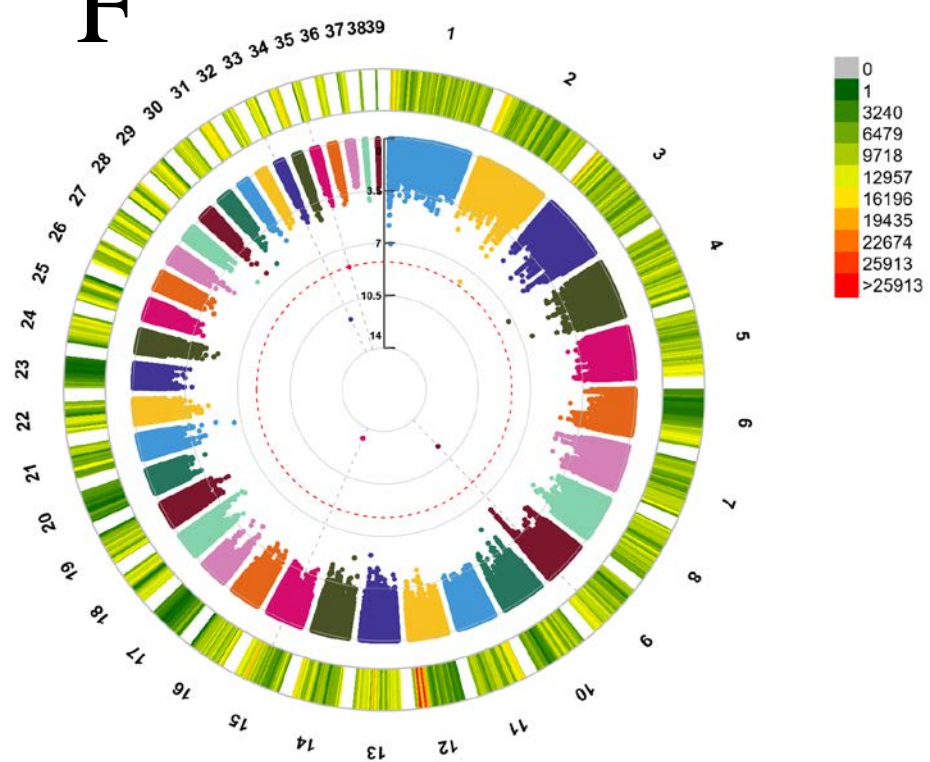**G**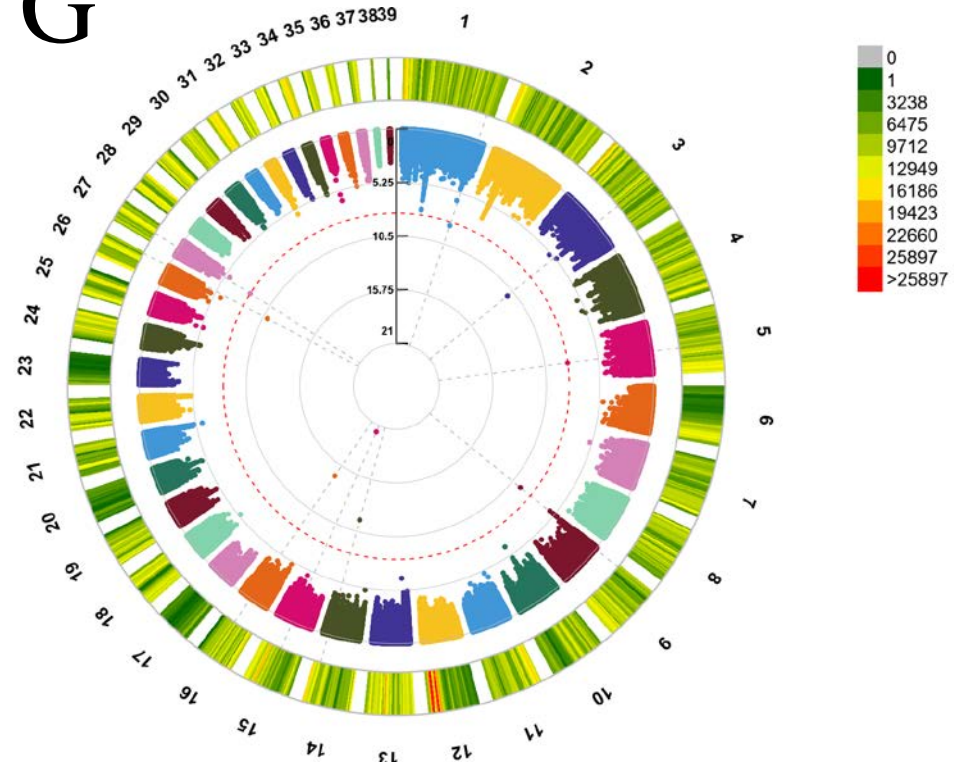

Supplement: 40104_2023_944_MOESM1_ESM.pdf [file 40104_2023_944_MOESM1_ESM.pdf]
