# Supplementary material for: Insights into genetic diversity and phenotypic variations in domestic geese through comprehensive population and pan-genome analysis
Source: PubMed Central journal article supplement (PMC10675864; doi:10.1186/s40104-023-00944-y), 2023-11-24

A

Name and Proportion of the Biological Process (Inner Ring)

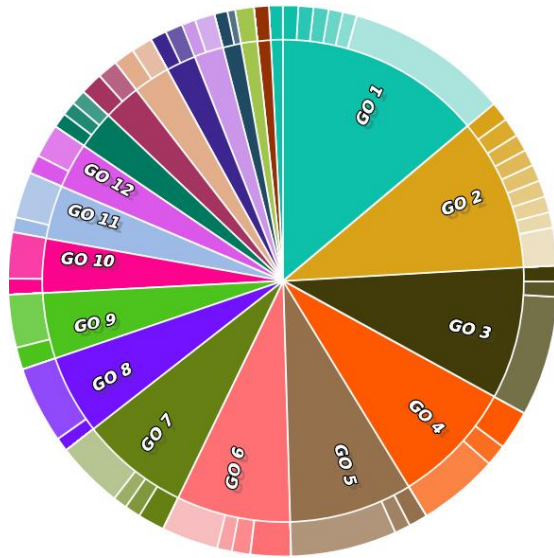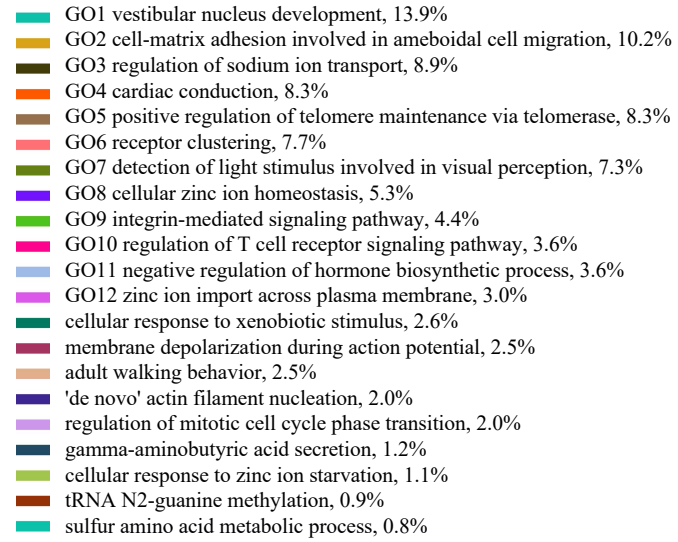

B

Name and Proportion of the Cellular Component (Inner Ring)

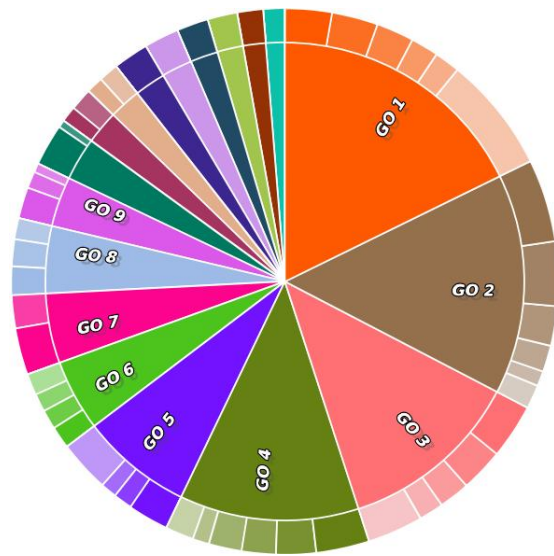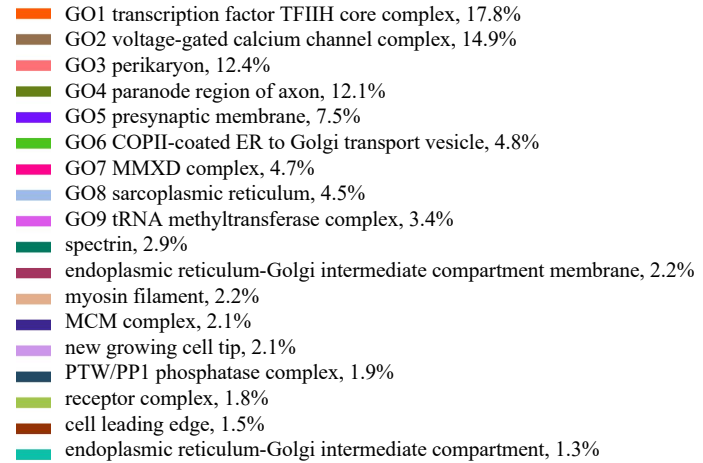

C

Name and Proportion of the Molecular Function (Inner Ring)

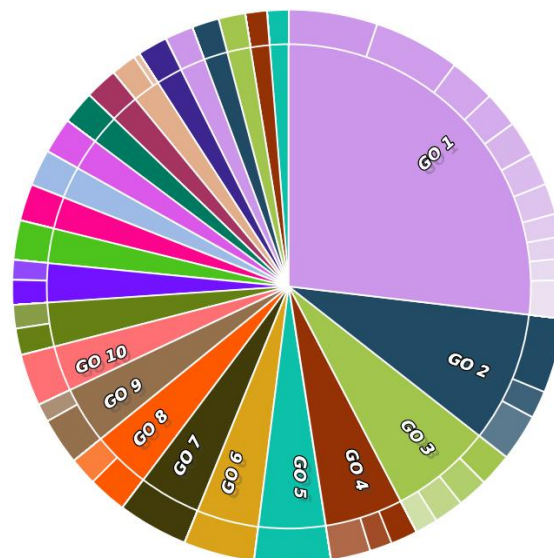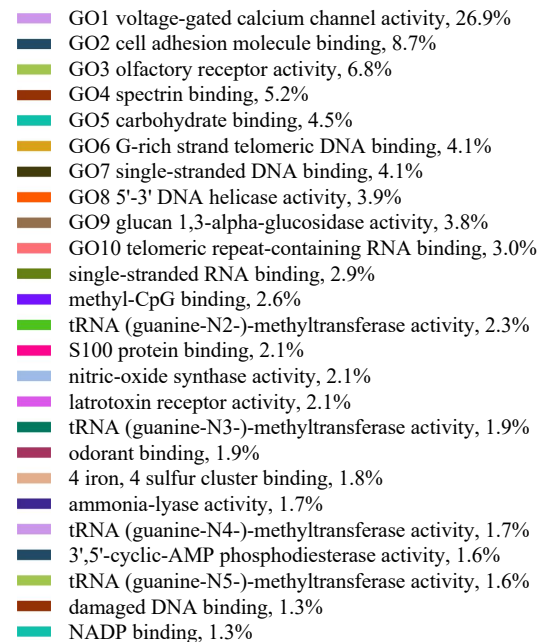

Supplement: 40104_2023_944_MOESM2_ESM.pdf [file 40104_2023_944_MOESM2_ESM.pdf]
