# Supplementary material for: Insights into genetic diversity and phenotypic variations in domestic geese through comprehensive population and pan-genome analysis
Source: PubMed Central journal article supplement (PMC10675864; doi:10.1186/s40104-023-00944-y), 2023-11-24

A

Different occurrence frequencies

China gene pool  
vs  
Europe gene pool 118↑ 167↓

China-domestic gene pool  
vs  
Wild gene pool 13↑ 696↓

Europe-domestic gene pool  
vs  
Wild gene pool 19↑ 662↓

High body weight gene pool  
vs  
Medium body weight gene pool 320↑ 1↓

High body weight gene pool  
vs  
Low body weight gene pool 1↑ 338↓

High reproductive ability gene pool  
vs  
Low reproductive ability gene pool 24↑ 4↓

Medium reproductive ability gene pool  
vs  
Low reproductive ability gene pool 11↑ 0↓

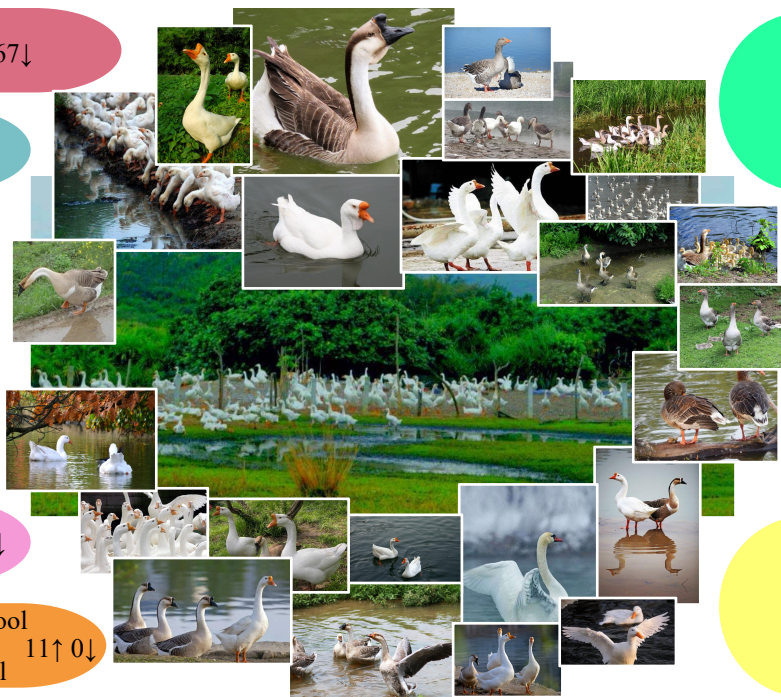

PAV  
+  
SNP

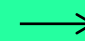

Reveal  
different  
population  
structure

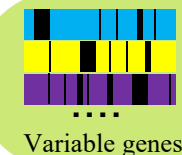

hair follicle  
maturation  
receptor clustering  
cell adhesion molecule  
binding

PAV-GWAS

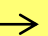

FOXRED1,  
GANAB etc.

PAV-GWAS

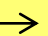

Many signals

B

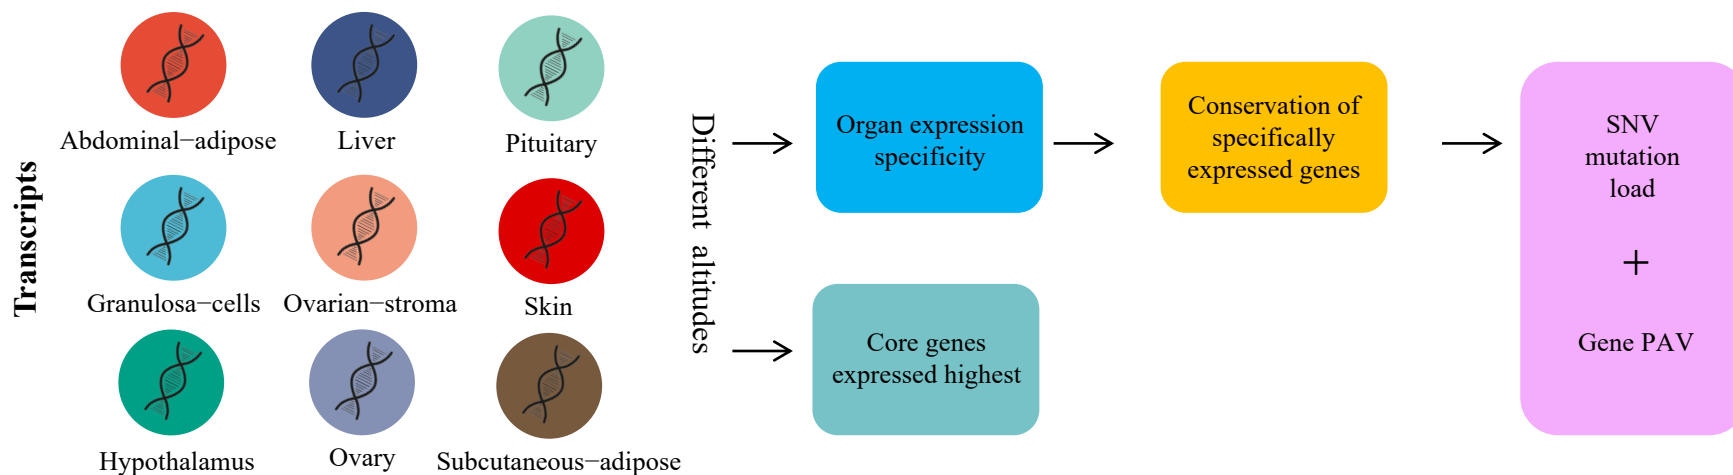

Supplement: 40104_2023_944_MOESM3_ESM.pdf [file 40104_2023_944_MOESM3_ESM.pdf]
